# Supplementary material for: Complementary feeding at 4 versus 6 months of age for preterm infants born at less than 34 weeks of gestation: a randomised, open-label, multicentre trial
Source: PubMed Central journal article supplement (PMC5388893; doi:10.1016/s2214-109x(17)30074-8), 2017-04-07
Supplement: mmc1.pdf [file mmc1.pdf]

# THE LANCET

## Global Health

### Supplementary appendix

This appendix formed part of the original submission and has been peer reviewed. We post it as supplied by the authors.

Supplement to: Gupta S, Agarwal R, Aggarwal KC, et al. Complementary feeding at 4 versus 6 months of age for preterm infants born at less than 34 weeks of gestation: a randomised, open label, multi-centre trial. *Lancet Glob Health* 2017; **5**: e501–11.

## Web Appendix

---

### *Panel 1. Rationale for choosing 4 vs. 6 months of corrected age*

A recent ESPGHAN review suggests that in term infants, CF should not be started before 17 weeks (~4 months) of age, and should not be delayed beyond 26 weeks (~6 months) of age.<sup>1</sup> Besides the age at initiation being 4 or 6 months, for preterm infants, we also need to answer whether this age should be taken as "corrected" age (CA; age adjusted for period of prematurity), or "postnatal" age (PNA; age since birth). Since CA is most often used to assess growth (anatomical development) and neurodevelopment (functional development) of preterm infants until two-three years of age, it seems logical that their nutritional needs, which parallel growth, and the anatomical and functional maturity of the gastrointestinal tract should also be guided by CA.

#### **Reference:**

1. Agostoni C, Decsi T, Fewtrell M, et al. ESPGHAN Committee on Nutrition. Complementary feeding: a commentary by the ESPGHAN Committee on Nutrition. *J Pediatr Gastroenterol Nutr* 2008 Jan;46(1):99-110

|                                                                                            | <b>Site 1: AIIMS</b>                                                                                                                                                        | <b>Site 2: SJH</b>                                                                                                                                                      | <b>Site 3: KH</b>                              |
|--------------------------------------------------------------------------------------------|-----------------------------------------------------------------------------------------------------------------------------------------------------------------------------|-------------------------------------------------------------------------------------------------------------------------------------------------------------------------|------------------------------------------------|
| <b>Type of institute</b>                                                                   | Autonomous healthcare and research institute                                                                                                                                | Urban, central government run institute                                                                                                                                 | District level first referral health facility  |
| <b>Deliveries per year</b>                                                                 | 2500                                                                                                                                                                        | 25000                                                                                                                                                                   | 12000                                          |
| <b>Patients' primary socio-economic strata</b>                                             | Middle to upper middle                                                                                                                                                      | Lower middle to lower                                                                                                                                                   | Lower to very low                              |
| <b>Neonatal intensive care unit</b>                                                        |                                                                                                                                                                             |                                                                                                                                                                         |                                                |
| Level of care                                                                              | Tertiary inborn                                                                                                                                                             | Tertiary inborn                                                                                                                                                         | Tertiary Inborn                                |
| Number of beds                                                                             | 18                                                                                                                                                                          | 50                                                                                                                                                                      | 30                                             |
| Nurse: patient ratio                                                                       | 1:2 to 1:3                                                                                                                                                                  | 1:6                                                                                                                                                                     | 1:10                                           |
| Average bed occupancy                                                                      | 90%                                                                                                                                                                         | 120%                                                                                                                                                                    | 110%                                           |
| Overall survival rate (2014)                                                               | 86.1%                                                                                                                                                                       | 85.2%                                                                                                                                                                   | 93.2%                                          |
| <b>Antenatal details of delivering mothers</b>                                             |                                                                                                                                                                             |                                                                                                                                                                         |                                                |
| Number of antenatal visits                                                                 | Most receive $\geq 3$ visits                                                                                                                                                | About 70% receive $\geq 3$ visits                                                                                                                                       | About 50% receive $\geq 3$ visits              |
| Iron-folic acid and calcium-vitamin D supplementation received                             | More than 80%                                                                                                                                                               | More than 80%                                                                                                                                                           | More than 80%                                  |
| Management for any complicating conditions                                                 | Appropriate                                                                                                                                                                 | Appropriate                                                                                                                                                             | Appropriate                                    |
| Reliable information on date of last menstrual period (LMP) and first trimester ultrasound | Available in almost 100%                                                                                                                                                    | Available in approx 70%                                                                                                                                                 | Available in approx 60%                        |
| Antenatal steroid coverage                                                                 | High                                                                                                                                                                        | High                                                                                                                                                                    | High                                           |
| <b>Clinical practices with respect to preterm infants &lt;34 wks of gestation</b>          |                                                                                                                                                                             |                                                                                                                                                                         |                                                |
| Intensive care                                                                             | Routinely cared for in the intensive care unit                                                                                                                              | Routinely cared for in the intensive care unit                                                                                                                          | Routinely cared for in the intensive care unit |
| Total parenteral nutrition                                                                 | Practiced                                                                                                                                                                   | Not practiced                                                                                                                                                           | Not practiced                                  |
| Minimal enteral nutrition                                                                  | Practiced                                                                                                                                                                   | Practiced                                                                                                                                                               | Practiced                                      |
| Expressed breast milk (EBM) feeding by gavage/paladai                                      | Practiced                                                                                                                                                                   | Practiced                                                                                                                                                               | Practiced                                      |
| Exclusive breastfeeding                                                                    | Actively pursued and promoted as part of unit policy<br>However, formula milk is provided based on clinical need                                                            |                                                                                                                                                                         |                                                |
| Human milk banking                                                                         | Not practiced                                                                                                                                                               | Not practiced                                                                                                                                                           | Not practiced                                  |
| Post discharge care                                                                        | Provided through a dedicated weekly high risk follow up clinic                                                                                                              |                                                                                                                                                                         |                                                |
| Feeding after discharge                                                                    | Exclusive breastfeeding followed by EBM by katori-spoon as required. Formula or other milk supplementation only in cases of lactation failure or inappropriate weight gain. |                                                                                                                                                                         |                                                |
| Micronutrient supplementation policy                                                       | Vitamin D 400 IU/day (800 IU /day for infants <1500g)<br>Iron at 2-3 mg/kg per day beginning at 2-4 weeks of postnatal age till one year of corrected age.                  | Vitamin D 400 IU/day ; Calcium 164 mg/day (approx 80-100mg/kg/day)<br>Iron at 2-3 mg/kg per day beginning at 2-4 weeks of postnatal age till one year of corrected age. |                                                |
| Others- ROP screening, cranial USG                                                         | Routine, serial CUS during nursery stay followed by one at 40 wks if required                                                                                               |                                                                                                                                                                         |                                                |
| Post-discharge early intervention services                                                 | Hospital based, routinely provided                                                                                                                                          |                                                                                                                                                                         | Not available                                  |
| <b>Table 1. Site description</b>                                                           |                                                                                                                                                                             |                                                                                                                                                                         |                                                |

| Procedures                                                                                                                                                                                                                                                   | Personnel involved                                                                                          | Methods                                                                                                                                                                                                                                                                                                                                                                                 |
|--------------------------------------------------------------------------------------------------------------------------------------------------------------------------------------------------------------------------------------------------------------|-------------------------------------------------------------------------------------------------------------|-----------------------------------------------------------------------------------------------------------------------------------------------------------------------------------------------------------------------------------------------------------------------------------------------------------------------------------------------------------------------------------------|
| <b>Tracking from birth till discharge</b>                                                                                                                                                                                                                    |                                                                                                             |                                                                                                                                                                                                                                                                                                                                                                                         |
| Daily tracking of NICU admissions                                                                                                                                                                                                                            | Research team                                                                                               | Through daily record of NICU admission register                                                                                                                                                                                                                                                                                                                                         |
| Gestation assessment                                                                                                                                                                                                                                         | Residents, verified by SG (AIIMS); SG (SJH and KH)                                                          | LMP/1 trimester ultrasound and corroboration with ENBS done within 96 hours of birth                                                                                                                                                                                                                                                                                                    |
| Morbidity recording during birth hospitalization                                                                                                                                                                                                             | Research team                                                                                               | Through daily record of NICU admission register                                                                                                                                                                                                                                                                                                                                         |
| Parental/family contact                                                                                                                                                                                                                                      | Research team                                                                                               | Through daily visit to mother, and need based counseling                                                                                                                                                                                                                                                                                                                                |
| Discharge advice                                                                                                                                                                                                                                             | Residents at all sites; research team met to record contact details                                         | Advice on post discharge care (temperature, hygiene, feeding, danger signs and follow up)                                                                                                                                                                                                                                                                                               |
| <b>Post discharge tracking and follow up</b>                                                                                                                                                                                                                 |                                                                                                             |                                                                                                                                                                                                                                                                                                                                                                                         |
| Clinical follow up schedule                                                                                                                                                                                                                                  | Residents/parent/family driven                                                                              | <b>AIIMS:</b> 2-7 days after discharge, then every 2 weeks (<32wks/<1500g), then monthly. Infants $\geq 32$ wks or $\geq 1500$ g followed up once at 6 wks of age and only those with any high risk factors were followed monthly thereafter. Individualized as per infants needs at any stage.<br><b>SJH and KH:</b> 2 weeks after discharge then individualized as per infants' needs |
| Post discharge telephonic contact                                                                                                                                                                                                                            | Research team                                                                                               | <b>AIIMS:</b> Telephonic contact 2 weeks prior to 4 month corrected age. Home visit if required<br><b>SJH/KH:</b> Telephonic contact made 6 weeks after discharge to call for research visit by dedicated research team to ensure follow up. This was later changed to 2 weeks after one year of study                                                                                  |
| Post discharge follow up care                                                                                                                                                                                                                                | Research team                                                                                               | Same as described earlier                                                                                                                                                                                                                                                                                                                                                               |
| Feeding and micronutrient supplementation                                                                                                                                                                                                                    | Residents (AIIMS)<br>Research team at SJH and KH                                                            | Same as described earlier                                                                                                                                                                                                                                                                                                                                                               |
| <b>Enrolment and randomization (at 4 month corrected age)</b>                                                                                                                                                                                                |                                                                                                             |                                                                                                                                                                                                                                                                                                                                                                                         |
| Informed consent and randomization                                                                                                                                                                                                                           | SG                                                                                                          | Written informed consent allocation concealment and randomization process described in text                                                                                                                                                                                                                                                                                             |
| Counseling for initiation of CF or continue milk feeding till 6 months of age, micronutrient supplementation                                                                                                                                                 | SG                                                                                                          | Using standardized counseling package described in text                                                                                                                                                                                                                                                                                                                                 |
| Oro-motor and developmental assessment                                                                                                                                                                                                                       | SG, assisted by early intervention professionals                                                            | Early intervention initiated in all infants if required in both groups, as per standard of care                                                                                                                                                                                                                                                                                         |
| Anthropometry                                                                                                                                                                                                                                                | SG                                                                                                          | Using standard procedures                                                                                                                                                                                                                                                                                                                                                               |
| Baseline DXA                                                                                                                                                                                                                                                 | Technicians from Department of Radio-diagnosis at AIIMS                                                     | Using standard procedures                                                                                                                                                                                                                                                                                                                                                               |
| Baseline data recording                                                                                                                                                                                                                                      | SG                                                                                                          | -                                                                                                                                                                                                                                                                                                                                                                                       |
| <b>Post enrolment follow up</b>                                                                                                                                                                                                                              |                                                                                                             |                                                                                                                                                                                                                                                                                                                                                                                         |
| Telephonic calls on day 2, 7, 14 and day 21 in both groups                                                                                                                                                                                                   | Medical social worker                                                                                       | Inquiry with respect to adherence to recommended feeding advice, referral to PI for defaulters, morbidity inquiry                                                                                                                                                                                                                                                                       |
| 5 month visit                                                                                                                                                                                                                                                | Medical social worker and dietician                                                                         | Home/hospital visit: 24 hour dietary recall, anthropometry, dietary advice                                                                                                                                                                                                                                                                                                              |
| 6 month visit                                                                                                                                                                                                                                                | SG: Counseling for initiation of complementary food to 6 month group<br>Medical social worker and dietician | Hospital visit for 6 month group for counseling on initiation of complementary feeding (done telephonically in an occasional case if hospital visit was not possible)<br><br>24-hr dietary recall, anthropometry, dietary advice to all through home/hospital visit                                                                                                                     |
| Telephonic calls on day 2, 7, 14 and day 21 in both groups                                                                                                                                                                                                   | Research team                                                                                               | Inquiry with respect to adherence to recommended feeding advice, referral to PI for defaulters, morbidity inquiry                                                                                                                                                                                                                                                                       |
| 7 month visit                                                                                                                                                                                                                                                | Medical social worker and dietician                                                                         | Home/hospital visit: 24 hour dietary recall, anthropometry, dietary advice                                                                                                                                                                                                                                                                                                              |
| 9 month visit                                                                                                                                                                                                                                                | Medical social worker and dietician                                                                         | Home/hospital visit: 24-hr dietary recall, anthropometry, dietary advice                                                                                                                                                                                                                                                                                                                |
| Telephonic inquiry at 10, 11 months                                                                                                                                                                                                                          | Medical social worker                                                                                       | Inquiry for any incident morbidity                                                                                                                                                                                                                                                                                                                                                      |
| 12 month visit                                                                                                                                                                                                                                               | Nurse, clinical psychologist, physiotherapist<br>(all masked to group assignment)                           | Anthropometry, blood sampling, DXA, neurodevelopment                                                                                                                                                                                                                                                                                                                                    |
| NICU-Neonatal intensive care unit, SG-First author, AIIMS-All India Institute of Medical Sciences, SJH-Safdarjung hospital, KH-Kasturba hospital, LMP-Date of last menstrual period, ENBS-Expanded New Ballard Scoring, DXA-Dual Energy X-Ray Absorptiometry |                                                                                                             |                                                                                                                                                                                                                                                                                                                                                                                         |
| <b>Table 2. Summary of study procedures</b>                                                                                                                                                                                                                  |                                                                                                             |                                                                                                                                                                                                                                                                                                                                                                                         |

### **Panel 2. Method of doing 24-hour dietary recall**

The 24-hour dietary intake assessments were performed by a trained and experienced dietician. The method of obtaining the 24-hour has been tested in the paediatric and neonatal clinical and ward settings by senior dieticians in the paediatric department of our tertiary academic healthcare and research centre.

The dietician conducted a structured interview with the mother (or caregiver) asking her to recall all food and drinks provided to the child during the previous 24 hours, beginning with the first feed in the morning. She asked the mother to recall chronologically the time and associated events around feeding the child for better recall. Specific probes were used with respect to the commonly used infant foods which might have been forgotten, or any foods that infant might have received as part of the common family meals.

Details were obtained with respect to the ingredients used to prepare a particular food-the dietician weighed the amount of raw ingredients in case the mother was only able to indicate the amount used using her fist or any other home utensil. The raw ingredients used to prepare a recipe were then converted to standard cooked weights/portion sizes using standard Indian references. The dietician cross-verified the conversion of raw ingredients to the cooked weights/portion sizes by asking the mother the total cooked quantity prepared, and measured the utensils she used to ascertain the cooked weight. She then asked the mother the amount eaten by the child and also measured the utensils used for feeding the child as required, to cross-verify the amount consumed by the child. The nutritional value of the food consumed by the child were derived using the nutritive values of Indian foods. All details were noted on a structured 24-hour dietary recall record form, and verified by an independent expert.

### **Panel 3. Definition of dietary indicators**

**Acceptable minimum dietary diversity:** The proportion of infants at 12 months corrected age who received foods from four or more of the seven food groups during the previous day on the 24-hour dietary recall. The seven food groups were: grains, roots and tubers, legumes and nuts, dairy products (milk, yogurt, cheese), flesh foods (meat, fish, poultry and liver/organ meats), eggs, vitamin-A rich fruits and vegetables, and other fruits and vegetables.

**Acceptable minimum meal frequency:** The proportion of breastfed infants who received solid, semi-solid, or soft foods at least 3 times or more; or, if non-breastfed, received milk solid, semi-solid, or soft foods at least four times or more in the previous 24-hours on the 24-hour dietary recall.

**Minimum acceptable diet:** This is a composite indicator based on minimum dietary diversity and minimum meal frequency, calculated differently for breastfed and non-breastfed infants.

- Breast-fed infants are defined to have received minimum acceptable diet if they have been provided semisolid/soft/solid foods at least 3 times in the previous day from four or more of the seven food groups listed above in previous 24-hours.
- Non-breastfed infants are defined to have received minimum acceptable diet if they have received at least 2 milk feedings, food from four or more food groups (excluding milk feeds), and have been fed at least four times in previous 24-hours.

**Consumption of iron-rich or iron-fortified foods:** This was defined as proportion of children who received an iron-rich food or iron-fortified food (e.g. commercially available cereals) or a food that was fortified in the home with a product that included iron during the previous day.

## Results: Additional data

| CA<br>(month) | Any breastfeeding  |                    |       | Any complementary feeding |                    |        |
|---------------|--------------------|--------------------|-------|---------------------------|--------------------|--------|
|               | 4-month            | 6-month            | P     | 4-month                   | 6-month            | P      |
| 4             | 165/203<br>(81.3%) | 153/197<br>(77.7%) | 0.370 | 0                         | 0                  | NA     |
| 5             | 158/197<br>(80.2%) | 134/180<br>(74.4%) | 0.181 | 188/197<br>(95.4%)        | 0/180              | <0.001 |
| 6             | 145/191<br>(75.9%) | 137/186<br>(73.7%) | 0.613 | 175/191<br>(91.6%)        | 6/186<br>(3.2%)    | <0.001 |
| 7             | 134/183<br>(73.2%) | 127/183<br>(69.4%) | 0.419 | 179/183<br>(97.8%)        | 166/183<br>(90.7%) | <0.003 |
| 9             | 126/181<br>(69.6%) | 121/175<br>(69.1%) | 0.923 | 177/181<br>(97.8%)        | 169/175<br>(96.6%) | 0.487  |
| 12            | 123/183<br>(67.2%) | 118/189<br>(62.4%) | 0.335 | 182/183<br>(98.9%)        | 187/189<br>(98.9%) | 0.978  |

Data are n (%). P-value from chi-square test. CA-Corrected age

**Table 3. Dietary profile of study infants over time**

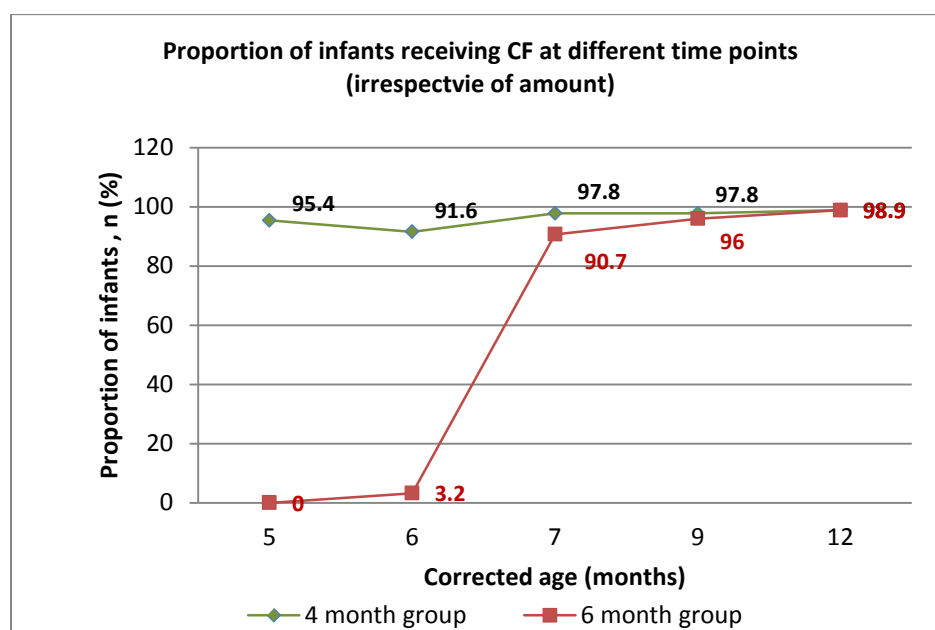

**Figure 1. Proportion of infants receiving complementary foods (irrespective of amount) at different time points by study group**

**Growth.** Mean weight (7794 vs. 7846 g,  $p=0.65$ ) and weight for age z-scores were comparable at 12 months CA as well as at all the intermediary time points (table 4). Mean values of length (71.1 vs. 71.1 cm), head circumference (43.7 vs. 43.8 cm), body mass index (10.9 vs. 11.0 kg/m<sup>2</sup>) and their respective z-scores were comparable between the two groups at 12 months CA (tables 4-6). Additionally, the change in weight, length, head circumference and body mass index and their respective z scores from birth until 12 months CA was also comparable between the two groups. Only a small proportion of infants exhibited catch up growth (increase of >0.67 SDS) in weight for age (10.8 vs. 5.8%), length for age (18.0 vs. 11.9%) and head circumference for age (10.2 vs. 4.7%) from birth until 12 months CA (table 7).

| CA (months)       | n       |         | Weight (g) |           | P     | Weight for age z-score |          | P     |
|-------------------|---------|---------|------------|-----------|-------|------------------------|----------|-------|
|                   | 4-month | 6-month | 4-month    | 6-month   |       | 4-month                | 6-month  |       |
| 4 (randomization) | 204     | 197     | 5117±906   | 5187±928  | 0.446 | -2.3±1.4               | -2.2±1.4 | 0.711 |
| 5                 | 197     | 180     | 5681±968   | 5652±958  | 0.771 | -2.0±1.4               | -2.1±1.4 | 0.658 |
| 6                 | 191     | 186     | 6144±1018  | 6152±972  | 0.942 | -1.9±1.4               | -1.9±1.4 | 0.908 |
| 7                 | 183     | 183     | 6483±1008  | 6576±983  | 0.375 | -1.8±1.3               | -1.8±1.3 | 0.707 |
| 9                 | 181     | 175     | 7071±1016  | 7138±1090 | 0.555 | -1.7±1.2               | -1.7±1.3 | 0.914 |
| 12                | 184     | 189     | 7794±1067  | 7846±1144 | 0.648 | -1.6±1.2               | -1.6±1.3 | 0.965 |

Data are mean±SD; p-value from Student t-test. CA-Corrected age

**Table 4. Weight and weight for age z-scores among study infants at different time points by study group**

| CA (months)       | n       |         | Length (cm) |          | P     | Length for age z score |          | P     |
|-------------------|---------|---------|-------------|----------|-------|------------------------|----------|-------|
|                   | 4-month | 6-month | 4-month     | 6-month  |       | 4-month                | 6-month  |       |
| 4 (randomization) | 204     | 195     | 58.5±3.1    | 58.6±3.2 | 0.778 | -2.0±1.4               | -2.0±1.5 | 0.918 |
| 5                 | 196     | 179     | 60.7±3.2    | 60.6±3.3 | 0.751 | -1.8±1.4               | -1.9±1.5 | 0.634 |
| 6                 | 188     | 183     | 63.0±3.3    | 62.9±3.1 | 0.751 | -1.7±1.4               | -1.8±1.4 | 0.562 |
| 7                 | 177     | 180     | 64.8±3.3    | 64.9±3.1 | 0.947 | -1.4±1.4               | -1.5±1.3 | 0.522 |
| 9                 | 178     | 174     | 67.5±3.2    | 67.5±3.2 | 0.986 | -1.5±1.3               | -1.6±1.4 | 0.695 |
| 12                | 184     | 189     | 71.1±3.0    | 71.1±3.3 | 0.813 | -1.6±1.2               | -1.6±1.3 | 0.491 |

Data are mean±SD. P-value from Student t-test. CA-corrected age

**Table 5. Length and length for age z scores among study infants at different time points by study group**

| CA (months)       | n       |         | Head circumference (cm) |          | P     | Head circumference for age z-score |          | P     |
|-------------------|---------|---------|-------------------------|----------|-------|------------------------------------|----------|-------|
|                   | 4-month | 6-month | 4-month                 | 6-month  |       | 4-month                            | 6-month  |       |
| 4 (randomization) | 204     | 197     | 38.9±1.6                | 39.0±1.4 | 0.315 | -1.7±1.2                           | -1.7±1.2 | 0.647 |
| 5                 | 196     | 180     | 39.9±1.4                | 39.9±1.3 | 0.944 | -1.6±1.1                           | -1.7±1.1 | 0.841 |
| 6                 | 188     | 183     | 40.8±1.4                | 40.8±1.3 | 0.878 | -1.5±1.1                           | -1.6±1.0 | 0.787 |
| 7                 | 177     | 180     | 41.5±1.4                | 41.6±1.3 | 0.633 | -1.4±1.1                           | -1.5±1.0 | 0.665 |
| 9                 | 178     | 174     | 42.5±1.4                | 42.6±1.3 | 0.436 | -1.5±1.0                           | -1.5±1.0 | 0.858 |
| 12                | 184     | 189     | 43.7±1.5                | 43.8±1.3 | 0.477 | -1.4±1.1                           | -1.3±1.0 | 0.941 |

Data are mean±SD. P-value from Student t-test. CA-corrected age

**Table 6. Head circumference and head circumference for age z scores among study infants at different time points by study group**

| CA (months)       | n       |         | BMI (kg/m <sup>2</sup> ) |          | P     | BMI for age z score |          | P     |
|-------------------|---------|---------|--------------------------|----------|-------|---------------------|----------|-------|
|                   | 4-month | 6-month | 4-month                  | 6-month  |       | 4-month             | 6-month  |       |
| 4 (randomization) | 204     | 195     | 8.7±1.2                  | 8.8±1.2  | 0.471 | -1.5±1.2            | -1.5±1.2 | 0.571 |
| 5                 | 196     | 179     | 9.3±1.2                  | 9.3±1.2  | 0.677 | -1.3±1.2            | -1.4±1.2 | 0.634 |
| 6                 | 188     | 183     | 9.7±1.3                  | 9.7±1.2  | 0.824 | -1.3±1.3            | -1.3±1.2 | 0.803 |
| 7                 | 177     | 180     | 10.0±1.2                 | 10.1±1.2 | 0.242 | -1.3±1.2            | -1.2±1.2 | 0.279 |
| 9                 | 178     | 174     | 10.4±1.1                 | 10.5±1.3 | 0.393 | -1.2±1.1            | -1.1±1.2 | 0.535 |
| 12                | 184     | 189     | 10.9±1.2                 | 11.0±1.2 | 0.488 | -1.0±1.0            | -0.9±1.1 | 0.561 |

Data are mean±SD. P-value from Student t-test. CA-corrected age

**Table 7. Body mass index (BMI) and BMI for age z scores among study infants at different time points by study group**

|                                  | 4-month         | 6-month        | P     |
|----------------------------------|-----------------|----------------|-------|
| <b>Birth to 12 month CA*</b>     |                 |                |       |
| Weight                           | 20/184 (10.9%)  | 11/189 (5.8%)  | 0.077 |
| Length                           | 10/50 (20.0%)   | 5/42 (11.9%)   | 0.295 |
| Head circumference               | 5/49 (10.2%)    | 2/43 (4.7%)    | 0.316 |
| <b>40wks PMA to 12 month CA*</b> |                 |                |       |
| Weight                           | 101/163 (62.0%) | 95/168 (56.5%) | 0.372 |
| Length                           | 45/95 (47.4%)   | 43/92 (46.7%)  | 0.931 |
| Head circumference               | 45/161 (28.0%)  | 36/166 (21.7%) | 0.190 |
| <b>4-12 month CA*</b>            |                 |                |       |

|                    |                |                |       |
|--------------------|----------------|----------------|-------|
| Weight             | 80/184 (43.5%) | 72/189 (38.1%) | 0.290 |
| Length             | 64/184 (34.8%) | 61/187 (32.6%) | 0.660 |
| Head circumference | 56/184 (30.4%) | 51/189 (27.0%) | 0.461 |
| Weight for length  | 39/184 (21.2%) | 37/186 (19.9%) | 0.75  |

\*Denominator includes infants whose data were available at both time points. Data are n (%). P-values from chi-square test. CA-Corrected age, PMA-Postmenstrual age

**Table 8. Proportion of infants showing catch up growth ( $\Delta$ SDS of 0-67) in the respective parameters during specified periods**

**Dietary data.** Dietary calorie intake per kg body weight (excluding intake from breast milk) was significantly higher in the 4-month group until seven months CA, and comparable thereafter to that in the 6-month group, while protein intake was higher until nine months CA and comparable thereafter (table 4). Only two-third of the dietary energy intake in either group came from CF at 12 months CA, with rest being from milk (other than breast-milk) (table 4, appendix table 9)

High proportion of infants were receiving iron (4-month CA: 91.4% vs. 88.9%,  $p=0.42$ ; 12 months CA: 71.6% vs. 70.9%,  $p=0.88$ ), and vitamin D (4-month CA: 88.9% vs. 90.0%,  $p=0.71$ ; 12 months CA: 69.4% vs. 70.9%,  $p=0.75$ ) (appendix table 10). Mean total iron intake from supplements and food was 2.4 vs. 2.3 mg/kg/day in 4- and 6-month groups respectively at five months CA, which decreased to 1.8 and 1.9 mg/kg/day, respectively by 12 months CA. Proportion of iron intake from CF remained low with a mean of 0.2 mg/kg/day at 12 months CA (table 4).

| CA (mo) | ENERGY INTAKE FROM CF: PROPORTION OF TOTAL ENERGY INTAKE |         |                |                |        | PROTEIN INTAKE FROM CF: PROPORTION OF TOTAL PROTEIN INTAKE |                    |        |
|---------|----------------------------------------------------------|---------|----------------|----------------|--------|------------------------------------------------------------|--------------------|--------|
|         | 4-month                                                  | 6-month | 4-month        | 6-month        | P      | 4-month                                                    | 6-month            | P      |
|         | N                                                        | N'      | Median (IQR)   | Median (IQR)   |        | Median (IQR)                                               | Median (IQR)       |        |
| 5       | 197                                                      | 180     | 62<br>(30-100) | 0<br>(0-0)     | <0.001 | 47.1<br>(18.8-100)                                         | 0                  | <0.001 |
| 6       | 191                                                      | 186     | 64<br>(34-100) | 0<br>(0-0)     | <0.001 | 53.3<br>(22.7-100)                                         | 0                  | <0.001 |
| 7       | 183                                                      | 183     | 67<br>(43-100) | 43<br>(20-100) | <0.001 | 56.3<br>(30.9-100)                                         | 30.6<br>(11.1-100) | <0.001 |
| 9       | 181                                                      | 175     | 65<br>(44-100) | 59<br>(33-100) | 0.140  | 54.2<br>(31.9-100)                                         | 45.5<br>(23.4-100) | 0.051  |
| 12      | 183                                                      | 189     | 66<br>(44-100) | 63<br>(42-100) | 0.558  | 59.4<br>(34.6-99.8)                                        | 53.7<br>(33.3-100) | 0.692  |

**Table 9. Energy and protein intake from complementary food as proportion of total dietary energy and protein intakes respectively**



| CA<br>(months)                                                                                 | Iron               |                    |      | Calcium            |                    |       | Vitamin D          |                    |       |
|------------------------------------------------------------------------------------------------|--------------------|--------------------|------|--------------------|--------------------|-------|--------------------|--------------------|-------|
|                                                                                                | 4-month            | 6-month            | P    | 4-month            | 6-month            | P     | 4-month            | 6-month            | P     |
| 5                                                                                              | 180/197<br>(91.4%) | 160/180<br>(88.9%) | 0.42 | 116/197<br>(58.9%) | 109/180<br>(60.6%) | 0.741 | 175/197<br>(88.9%) | 162/180<br>(90.0%) | 0.713 |
| 6                                                                                              | 171/191<br>(89.5%) | 169/186<br>(90.9%) | 0.79 | 103/191<br>(53.9%) | 106/186<br>(57.0%) | 0.550 | 169/191<br>(88.5%) | 172/186<br>(92.5%) | 0.187 |
| 7                                                                                              | 163/183<br>(89.1%) | 166/183<br>(90.7%) | 0.60 | 109/183<br>(59.6%) | 104/183<br>(56.8%) | 0.596 | 167/183<br>(91.3%) | 167/183<br>(91.3%) | 1.00  |
| 9                                                                                              | 153/181<br>(84.5%) | 146/175<br>(83.4%) | 0.78 | 94/181<br>(51.9%)  | 85/175<br>(48.6%)  | 0.526 | 148/181<br>(82.3%) | 140/175<br>(80.0%) | 0.671 |
| 12                                                                                             | 131/184<br>(71.2%) | 134/189<br>(70.9%) | 0.95 | 84/184<br>(45.7%)  | 81/189<br>(42.9%)  | 0.59  | 127/184<br>(69.0%) | 134/189<br>(70.9%) | 0.752 |
| Data are number (%). CA-Corrected age                                                          |                    |                    |      |                    |                    |       |                    |                    |       |
| <b>Table 10. Proportion of study infants receiving supplements at different points of time</b> |                    |                    |      |                    |                    |       |                    |                    |       |

| CA (mo) | All infants |              |         |              | P      | Breastfed infants |            |              |            | P            | Non breastfed infants |               |         |               | P      |
|---------|-------------|--------------|---------|--------------|--------|-------------------|------------|--------------|------------|--------------|-----------------------|---------------|---------|---------------|--------|
|         | 4-month     |              | 6-month |              |        | 4-month           |            | 6-month      |            |              | 4-month               |               | 6-month |               |        |
|         | N           | Median (IQR) | N       | Median (IQR) | N      | Median (IQR)      | N          | Median (IQR) | N          | Median (IQR) | N                     | Median (IQR)  |         |               |        |
| 5       | 197         | 67 (35-120)  | 180     | 27 (0-93)    | <0.001 | 158               | 53 (28-99) | 134          | 0 (0-40)   | <0.001       | 39                    | 147 (109-194) | 46      | 117 (93-145)  | 0.072  |
| 6       | 191         | 73 (40-121)  | 186     | 30 (0-98)    | <0.001 | 145               | 57 (32-90) | 137          | 0 (0-40)   | <0.001       | 46                    | 137 (119-170) | 49      | 108 (81-129)  | <0.001 |
| 7       | 183         | 82 (52-118)  | 183     | 65 (34-105)  | <0.001 | 134               | 67 (46-95) | 127          | 44 (25-71) | <0.001       | 49                    | 118 (96-150)  | 56      | 108 (91-147)  | 0.381  |
| 9       | 181         | 84 (55-117)  | 175     | 80 (41-114)  | 0.108  | 126               | 69 (48-92) | 121          | 55 (36-85) | <0.008       | 55                    | 117 (96-149)  | 54      | 119 (101-143) | 0.964  |
| 12      | 183         | 86 (68-107)  | 189     | 82 (60-112)  | 0.244  | 123               | 79 (59-96) | 118          | 66 (50-85) | 0.030        | 60                    | 108 (87-130)  | 71      | 108 (87-132)  | 0.884  |

**Table 11. Dietary Energy intake per kg in study infants at different time points by study groups (Excludes energy intake from breast milk)\*\***
